# Supplementary material for: Sequential Membrane Filtration to Recover Polyphenols and Organic Acids from Red Wine Lees: The Antioxidant Properties of the Spray-Dried Concentrate
Source: MDPI journal article supplement (doi:10.3390/membranes12040353), 2022-03-23
Supplement: s1 [file s1]

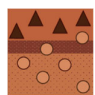

# Sequential Membrane Filtration to Recover Polyphenols and Organic Acids from Red Wine Lees: The Antioxidant Properties of the Spray-Dried Concentrate

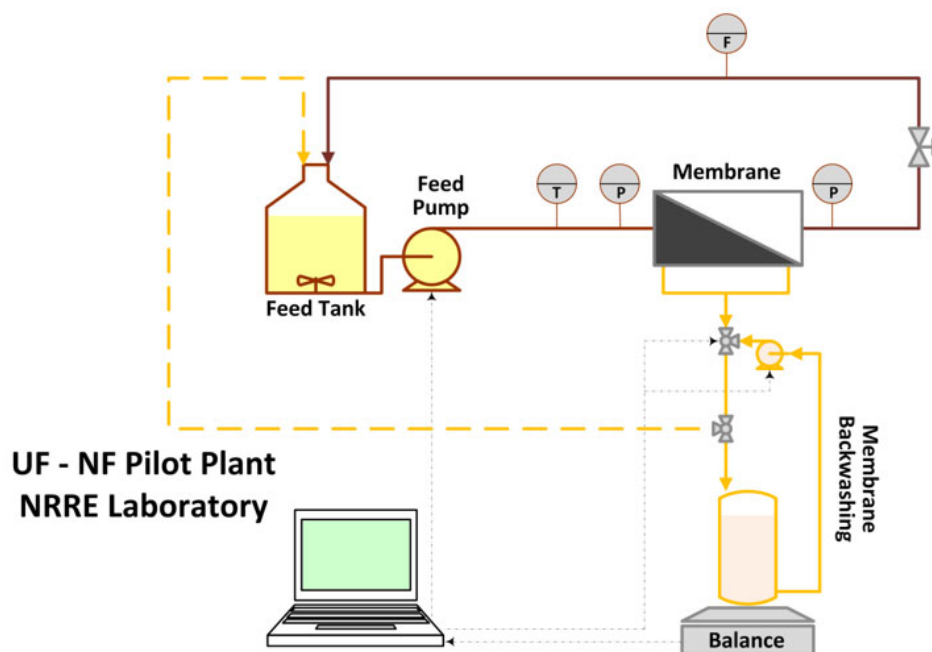

Figure S1. Custom made laboratory-scale cross-flow filtration pilot unit.

### ==== Shimadzu LCsolution Calibration Curve ====

<Calibration Curve>

ID# : 1  
 Name : L-tartaric acid  
 Quantitative Method : External Standard  
 Function :  $f(x) = 1211.12x + 2093.76$   
 $R^2 = 0.9990222$   $R^2 = 0.9980453$   
 MeanRF:1233.35 RFSD:85.9492 RFRSD:6.96876  
 FitType : Linear  
 ZeroThrough : Not Through  
 WeightedRegression : None  
 Detector Name : PDA

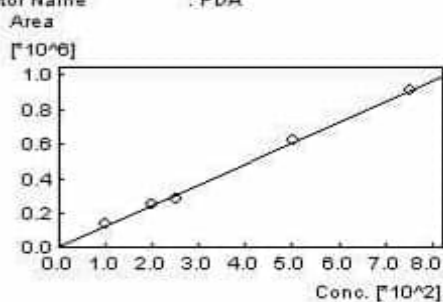

| # | Conc. (Ratio) | Area     | Area   |
|---|---------------|----------|--------|
| 1 | 101.000       | 138147.4 | 138147 |
| 2 | 202.000       | 247132.9 | 247133 |
| 3 | 252.000       | 284400.8 | 284401 |
| 4 | 501.000       | 617999.1 | 617999 |
| 5 | 752.000       | 912492.5 | 912492 |

ID# : 2  
 Name : Di-malic acid  
 Quantitative Method : External Standard  
 Function :  $f(x) = 814.951x + 5514.09$   
 $R^2 = 0.9994785$   $R^2 = 0.9989572$   
 MeanRF:592.943 RFSD:22.9377 RFRSD:3.86846  
 FitType : Linear  
 ZeroThrough : Not Through  
 WeightedRegression : None  
 Detector Name : PDA

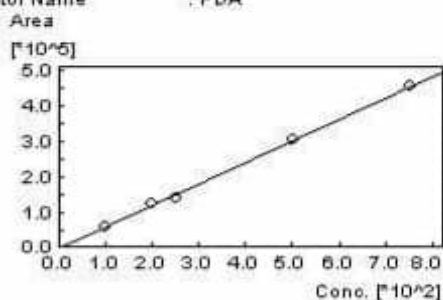

| # | Conc. (Ratio) | Area     | Area   |
|---|---------------|----------|--------|
| 1 | 101.000       | 58695.1  | 58695  |
| 2 | 202.000       | 123027.2 | 123027 |
| 3 | 252.000       | 140583.5 | 140584 |
| 4 | 501.000       | 305332.4 | 305332 |
| 5 | 752.000       | 456622.5 | 456622 |

Figure S2. Calibration curves for tartaric and malic acid.

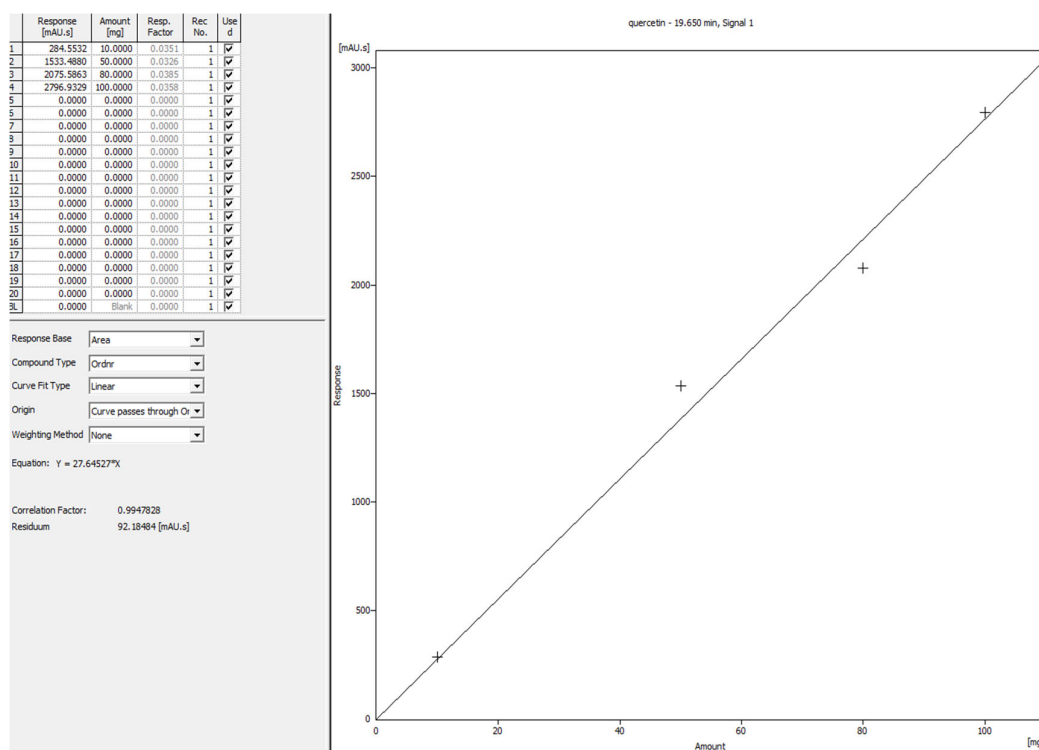

Figure S3. Calibration curve of quercetin.
